# Supplementary material for: Comparison of long-term kidney functions after radical nephrectomy and simple nephrectomy
Source: PeerJ. 2019 Apr 12;7:e6701. doi: 10.7717/peerj.6701 (PMC6463866; doi:10.7717/peerj.6701)
Supplement: Data S1 [file peerj-07-6701-s001.xlsx]

## Sheet: peerj-31503-GFR__NEPHRECTOMY_(R
dosyano	Group	Gender	Age	Side	TumorSize	TumorStage	PathologicalDiagnosis	FurhmannGrade	Preoperativecreatinine	PreoperativeGFR	PreoperativeGFRclassification	Postoperativecreatinine	PostoperativeGFR	PostoperativeCKD	PostoperativeGFRclassification	GFR1.Month	Month1CKD	Month1GFRclassification	GFR1.Years	Years1CKD	Year1GFRclassification	EndpointCreatinine	EndpointGFR	ENDpointCKD	EndpointGFRclasification	DifferentGFRpreoperativepostoperative	DifferentGFRpreoperative1MONTH	DifferentGFRpreoperative1YEARS	DifferentGFRpreoperativeENDPOİNT	CHANGEgfrRATİOpreoppostop	CHANGEgfrRATİOpreop1MONTH	CHANGEgfrRATİOpreop1YEARS	CHANGEgfrRATİOpreopENDPOİNT	Followduration	filter_$
883355	1	1	60	1	13	31	4		1.14	69	1	1.33	58	2	2	48	2	2	71	1	1	1.14	51.5	2	2	11	21	-2	17.5	9.64912	0.304348	-0.0289855	0.253623	21	1
858252	1	1	49	2	13	22	1	4	0.84	103	1	1.21	67	1	1	63	1	1	67	1	1	1.11	74	1	1	36	40	36	29	42.8571	0.38835	0.349515	0.281553	43	1
853105	1	1	63	1	8	21	5		0.57	153	1	1.1	71	1	1	86	1	1	75	1	1	0.97	83	1	1	82	67	78	70	143.86	0.437908	0.509804	0.457516	45	1
116008	1	2	63	2	5	12	6		0.73	85	1	1.21	47	2	2	50	2	2	55	2	2	0.96	62	1	1	38	35	30	23	52.0548	0.411765	0.352941	0.270588	47	1
853371	1	1	70	2	9.5	31	1	4	0.91	87	1	1.55	47	2	2	60	1	1	51	2	2	1.4	53.25	2	2	40	27	36	33.75	43.956	0.310345	0.413793	0.387931	19	1
855426	1	2	46	1	14	22	1	4	0.78	84	1	1.06	59	2	2	78	1	1	79	1	1	0.82	80.49	1	1	25	6	5	3.51	32.0513	0.0714286	0.0595238	0.0417857	18	1
645305	1	2	73	2	7	31	1	3	0.74	81	1	0.91	64	1	1	57	2	2	42	2	3	0.94	61	1	1	17	24	39	20	22.973	0.296296	0.481481	0.246914	51	1
789237	1	1	48	2	7	21	1	2	0.84	103	1	1	84	1	1	78	1	1	86	1	1	1.2	68	1	1	19	25	17	35	22.619	0.242718	0.165049	0.339806	38	1
489777	1	2	46	1	3.5	11	1	2	0.82	79	1	1.46	40	2	3	48	2	2	48	2	2	0.99	63	1	1	39	31	31	16	47.561	0.392405	0.392405	0.202532	50	1
794678	1	1	51	2	4.5	12	5		0.68	130	1	0.76	114	1	1				86	1	1	1.05	78	1	1	16		44	52	23.5294		0.338462	0.4	46	1
465355	1	2	59	1	3.5	11	1	2	0.92	66	1	1.34	43	2	3	54	2	2	42	2	3	1	60	1	1	23	12	24	6	25	0.181818	0.363636	0.0909091	55	1
497146	1	1	69	2	4	11	1		0.79	103	1	1.62	45	2	2	63	1	1	66	1	1	1.16	66.75	1	1	58	40	37	36.25	73.4177	0.38835	0.359223	0.351942	11	1
476443	1	1	42	2	8.5	21	4	3	1.22	69	1	1.75	45	2	2	48	2	2	42	2	3	1.44	56	2	2	24	21	27	13	19.6721	0.304348	0.391304	0.188406	51	1
751456	1	1	53	1	5.3	12	1	4	0.81	105	1	1.44	54	2	2	59	2	2	67	1	1	1.2	67.31	1	1	51	46	38	37.69	62.963	0.438095	0.361905	0.358952	25	1
773078	1	2	58	2	5	31	1	3	0.71	89	1	1.32	43	2	2	50	2	2				1.11	53.85	2	2	46	39		35.15	64.7887	0.438202		0.394944	3	1
731604	1	1	28	2	4	11	1	3	1.21	75	1	1.9	45	2	2	43	2	3	44	2	2	1.92	38.42	2	3	30	32	31	36.58	24.7934	0.426667	0.413333	0.487733	21	1
760170	1	1	50	2	5	12	1	2	0.66	134	1	0.97	87	1	1	61	1	1	61	1	1	1.15	70	1	1	47	73	73	64	71.2121	0.544776	0.544776	0.477612	60	1
743097	1	1	49	1	5	12	10		0.81	107	1	1	84	1	1	80	1	1	71	1	1	1.07	77	1	1	23	27	36	30	28.3951	0.252336	0.336449	0.280374	55	1
206723	1	1	60	1	9	21	1	2	0.77	109	1	1.09	73	1	1	83	1	1	89	1	1	2.5	28.14	2	4	36	26	20	80.86	46.7532	0.238532	0.183486	0.741835	35	1
743870	1	1	36	1	11	22	5		1.01	88	1	1.21	72	1	1	83	1	1	65	1	1	1.37	61	1	1	16	5	23	27	15.8416	0.0568182	0.261364	0.306818	55	1
740363	1	1	72	2	6.5	12	1	2	1	78	1	1.43	51	2	2	52	2	2	57	2	2	1.33	56	2	2	27	26	21	22	27	0.333333	0.269231	0.282051	45	1
740702	1	2	76	2	6	12	1	2	0.88	66	1	1.54	34	2	3	46	2	2	45	2	2	1.38	39.51	2	3	32	20	21	26.49	36.3636	0.30303	0.318182	0.401364	22	1
741040	1	2	65	1	4	11	1	3	0.54	120	1	0.83	73	1	1				71	1	1	0.85	71.3	1	1	47		49	48.7	87.037		0.408333	0.405833	17	1
736980	1	1	76	1	8	21	1	3	0.91	86	1	1.64	43	2	3	51	2	2	49	2	2	1.4	45	2	2	43	35	37	41	47.2527	0.406977	0.430233	0.476744	33	1
728194	1	1	66	1	3	11	1	2	0.83	98	1	1.31	58	2	2	59	2	2	62	1	1	1	78	1	1	40	39	36	20	48.1928	0.397959	0.367347	0.204082	61	1
715564	1	2	48	2	6	12	6		0.81	80	1	0.94	67	1	1	55	2	2	57	2	2	1.03	60	1	1	13	25	23	20	16.0494	0.3125	0.2875	0.25	48	1
716687	1	1	68	2	6	12	1	2	0.78	105	1	1.34	56	2	2	45	2	2	62	1	1	1.27	60	1	1	49	60	43	45	62.8205	0.571429	0.409524	0.428571	50	1
706613	1	2	66	1	5	12	5		0.59	108	1	0.96	61	1	1	64	1	1	67	1	1	0.96	67	1	1	47	44	41	41	79.661	0.407407	0.37963	0.37963	12	1
702612	1	2	79	2	3.5	11	2		0.77	76	1	0.94	61	1	1	56	2	2	50	2	2	1.1	50	2	2	15	20	26	26	19.4805	0.263158	0.342105	0.342105	31	1
880076	1	2	70	2	4	11	1	2	0.63	99	1	0.76	80	1	1	61	1	1	53	2	2	0.81	74	1	1	19	38	46	25	30.1587	0.383838	0.464646	0.252525	43	1
847612	1	2	38	1	7	12	1	2	1.03	63	1	1.06	61	1	1				83	1	1	0.82	82.49	1	1	2		-20	-19.49	1.94175		-0.31746	-0.309365	18	1
904327	1	1	58	2	8	31	1	3	1.11	72	1	1.42	54	2	2				68	1	1	1.42	67	1	1	18		4	5	16.2162		0.0555556	0.0694444	10	1
911887	1	2	54	2	6	12	1	4	0.69	94	1	0.88	71	1	1	49	2	2	56	2	2	0.88	61	1	1	23	45	38	33	33.3333	0.478723	0.404255	0.351064	12	1
917783	1	2	36	2	7	12	4		0.75	92	1	0.88	77	1	1	71	1	1	81	1	1	0.87	77	1	1	15	21	11	15	20	0.228261	0.119565	0.163043	36	1
573382	1	1	56	2	5	12	1	2	1.13	71	1	1.22	65	1	1				54	2	2	1.42	54	2	2	6		17	17	5.30973		0.239437	0.239437	12	1
938861	1	1	55	2	11.5	31	1	4	1.16	69	1	1.3	60	1	1	64	1	1				1.26	63	1	1	9	5		6	7.75862	0.0724638		0.0869565	16	1
487399	1	2	65	2	4.5	12	1	2	0.6	106	1	0.82	74	1	1	59	2	2	52	2	2	0.86	70	1	1	32	47	54	36	53.3333	0.443396	0.509434	0.339623	33	1
864721	1	1	46	2	9	12	1	3	1.14	73.5	1	1.17	71.3	1	1	48.3	2	2	68	1	1	1.22	67.9	1	1	2.2	25.2	5.5	5.6	1.92982	0.342857	0.0748299	0.0761905	16	1
924984	1	1	39	1	17	31	1	4	1.29	65.9	1	1.37	61.4	1	1	76.7	1	1				1.14	76	1	1	4.5	-10.8		-10.1	3.48837	-0.163885		-0.153263	3	1
812760	1	1	57	2	4	11	1	3	1.12	71.8	1	1.5	51.2	2	2	45.6	2	2	44	2	3	1.96	37	2	3	20.6	26.2	27.8	34.8	18.3929	0.364903	0.387187	0.48468	21	1
946301	1	1	48	2	3.5	11	1	3	1.26	64.9	1	1.62	48.5	2	2	47	2	2	47	2	2	1.68	46	2	2	16.4	17.9	17.9	18.9	13.0159	0.275809	0.275809	0.291217	31	1
864778	1	1	58	1	4	11	7		0.93	88.7	1	1.17	68	1	1	72	1	1	66	1	1	1.07	75	1	1	20.7	16.7	22.7	13.7	22.2581	0.188275	0.255919	0.154453	24	1
968726	1	1	61	2	7.5	12	5		1.06	75	1	1.23	63.5	1	1	57	2	1	56	2	2	1.33	58	2	2	11.5	18	19	17	10.8491	0.24	0.253333	0.226667	28	1
262925	1	1	47	1	3	11	1	2	1.08	77.8	1	1.18	70.8	1	1	61.2	1	1	51	2	2	1.55	51	2	2	7	16.6	26.8	26.8	6.48148	0.213368	0.344473	0.344473	10	1
991903	1	1	69	2	11	21	5		1.09	71.2	1	1.12	69.9	1	1	41	2	3	45	2	2	1.41	53	2	2	1.3	30.2	26.2	18.2	1.19266	0.424157	0.367978	0.255618	15	1
159717	1	1	65	2	5	12	1	4	0.94	85.6	1	1.39	54.5	2	2	58	2	2	60	1	1	1.28	60	1	1	31.1	27.6	25.6	25.6	33.0851	0.32243	0.299065	0.299065	5	1
1013805	1	1	63	2	7.5	21	1	4	1.07	74.1	1	1.11	66	1	1	62	1	1	43	2	3	1.71	43	2	3	8.1	12.1	31.1	31.1	7.57009	0.163293	0.419703	0.419703	12	1
878667	1	1	69	2	8.5	31	1	4	1.07	73	1	1.5	49.3	2	2	50	2	2	46	2	2	1.6	46	2	2	23.7	23	27	27	22.1495	0.315068	0.369863	0.369863	6	1
499232	1	1	46	1	3	11	1	2	1.03	83	1	1.1	76.7	1	1	66	1	1	69	1	1	1.1	69	1	1	6.3	17	14	14	6.1165	0.204819	0.168675	0.168675	14	1
752547	1	1	69	2	5	12	1	3	1.26	60	1	1.38	54.3	2	2	34	2	3	32	2	3	2.16	32	2	3	5.7	26	28	28	4.52381	0.433333	0.466667	0.466667	11	1
930106	1	2	55	2	5.5	12	1	2	0.84	75	1	1.09	55	2	2	55	2	2	62	1	1	0.98	62	1	1	20	20	13	13	23.8095	0.266667	0.173333	0.173333	7	1
563444	1	2	48	2	10	21	4		0.77	85	1	0.78	84	1	1	60	1	1	50	2	2	1.11	56	2	2	1	25	35	29	1.2987	0.294118	0.411765	0.341176	10	1
1078366	1	2	54	2	10	22	7		0.94	66	1	1.11	54	2	2	54	2	2	78	1	1	1.02	60	1	1	12	12	-12	6	12.766	0.181818	-0.181818	0.0909091	10	1
987431	1	1	70	1	10	11	8		1	78.5	1	1.35	55.5	2	2	48.4	2	2				1.52	48.4	2	2	23	30.1		30.1	23	0.383439		0.383439	1	1
958280	1	1	53	1	14.5	31	1	4	0.82	104	1	0.88	96.2	1	1	65	1	1	62	1	1	1.28	62	1	1	7.8	39	42	42	9.5122	0.375	0.403846	0.403846	17	1
1066560	1	2	57	2	4.5	12	1	3	0.77	82	1	1.05	57	2	2	55	2	2	59	2	2	1.03	59	2	2	25	27	23	23	32.4675	0.329268	0.280488	0.280488	9	1
1079372	1	1	34	2	4	11	1	2	1.03	87	1	1.66	50	2	2	77	1	1	67	1	1	1.29	67	1	1	37	10	20	20	35.9223	0.114943	0.229885	0.229885	6	1
1095014	1	2	58	2	4.5	12	1	3	0.55	120	1	0.94	65	1	1	63	1	1	67	1	1	0.91	67	1	1	55	57	53	53	100	0.475	0.441667	0.441667	3	1
1097949	1	2	50	1	4.5	31	1	3	0.63	106	1	0.65	102	1	1	70	1	1	88	1	1	0.74	88	1	1	4	36	18	18	6.34921	0.339623	0.169811	0.169811	5	1
1104225	1	1	69	2	6	12	7		0.73	113	1	1.03	77	1	1	83	1	1				0.96	83	1	1	36	30		30	49.3151	0.265487		0.265487	1	1
526206	1	1	69	2	4	11	2	3	1.18	65	1	1.72	42.1	2	3	31.7	2	3				2.2	31.7	2	3	22.9	33.3		33.3	19.4068	0.512308		0.512308	1	1
917239	1	1	64	2	5.5	12	1	3	1	79.9	1	1.09	72.3	1	1	65.4	1	1				1.19	65.4	1	1	7.6	14.5		14.5	7.6	0.181477		0.181477	7	1
917664	1	1	56	2	10	22	5		1.03	79.4	1	1.29	61.2	1	1	53.5	2	2	61	1	1	1.35	58	2	2	18.2	25.9	18.4	21.4	17.6699	0.326196	0.231738	0.269521	19	1
428265	1	1	67	1	11	22	1	3	1	79.2	1	1.06	74	1	1	47	2	2	46	2	2	1.53	48	2	2	5.2	32.2	33.2	31.2	5.2	0.406566	0.419192	0.393939	33	1
22144742196	1	1	70	1	3.5	11	1	2	1	78.5	1	1.07	72.6	1	1	75	1	1				1.04	75	1	1	5.9	3.5		3.5	5.9	0.044586		0.044586	9	1
59200122562	1	2	73	2	8	21	1	3	0.81	73.6	1	0.96	60.5	1	1	48.1	2	2				1.17	48	2	2	13.1	25.5		25.6	16.1728	0.346467		0.347826	9	1
32647132110	1	1	57	1	2	11	5		1.29	61	1	1.75	42.9	2	3	49.3	2	2	47	2	2	1.44	53	2	2	18.1	11.7	14	8	14.031	0.191803	0.229508	0.131148	57	1
33640763226	1	2	82	2	14	31	1		0.84	68.9	1	0.85	68	1	1	71.9	1	1				0.81	71.9	1	1	0.9	-3		-3	1.07143	-0.0435414		-0.0435414	1	1
24928875960	1	1	80	1	4.4	12	1	4	0.84	93.3	1	0.84	93	1	1	60	1	1				1.22	60	1	1	0.3	33.3		33.3	0.357143	0.356913		0.356913	2	1
25141545760	1	1	61	2	6	12	4	2	1.19	64.4	1	1	78.7	1	1	42.9	2	3	50	2	2	2.07	35	2	3	-14.3	21.5	14.4	29.4	-12.0168	0.333851	0.223602	0.456522	48	1
27544628132	1	1	53	1	7.2	21	2	2	1.02	81.2	1	1.05	78.5	1	1	84	1	1	84	1	1	1.01	81	1	1	2.7	-2.8	-2.8	0.2	2.64706	-0.0344828	-0.0344828	0.00246305	45	1
54280324356	1	1	70	1	9	31	2		0.81	100.1	1	0.9	88.6	1	1	65.5	1	1	78	1	1	1.77	40.63	2	3	11.5	34.6	22.1	59.47	14.1975	0.345654	0.220779	0.594106	20	1
40723041270	1	1	62	1	4	31	2	4	1.08	73.6	1	1.52	49.6	2	2	41.3	2	3	70	1	1	1.13	69.89	1	1	24	32.3	3.6	3.71	22.2222	0.438859	0.048913	0.0504076	24	1
34828550522	1	2	51	1	5	44	9	4	0.68	96.9	1	0.64	103.9	1	1	64.3	1	1	66	1	1	0.82	77	1	1	-7	32.6	30.9	19.9	-10.2941	0.336429	0.318885	0.205366	52	1
64606108034	1	1	73	2	4	11	1	2	1.05	73.5	1	1.54	47.3	2	2	47.3	2	2	37	2	3	1.87	37.8	2	3	26.2	26.2	36.5	35.7	24.9524	0.356463	0.496599	0.485714	13	1
32272294382	1	2	40	1	7	12	1	3	0.63	111.2	1	0.56	127.4	1	1	78.7	1	1				0.85	78.7	1	1	-16.2	32.5		32.5	-25.7143	0.292266		0.292266	1	1
11389179324	1	1	80	2	9	21	1	3	1.08	69.9	1	1.08	69.9	1	1	63.7	1	1	56	2	2	1.3	56	2	2	0	6.2	13.9	13.9	0	0.0886981	0.198856	0.198856	50	1
23725177734	1	2	74	2	9	21	1	3	0.86	68.5	1	0.76	79	1	1	76.7	1	1				0.78	76.73	1	1	-10.5	-8.2		-8.23	-12.2093	-0.119708		-0.120146	1	1
33212154438	1	1	68	2	3.5	11	1	4	0.87	92.7	1	1.78	40.6	2	3	54.4	2	2				1.45	55.44	2	2	52.1	38.3		37.26	59.8851	0.413161		0.401942	7	1
53002268848	1	2	39	1	7.5	21	1	2	1.03	63.4	1	1.06	61.3	1	1				82	1	1	0.82	82.4	1	1	2.1		-18.6	-19	2.03883		-0.293375	-0.299685	18	1
73210062786	1	1	64	2	5.5	12	1	3	1	79.9	1	1.09	72.3	1	1				65	1	1	1.19	65	1	1	7.6		14.9	14.9	7.6		0.186483	0.186483	7	1
15334883038	1	1	70	1	11	22	2		1.04	74.4	1	2.45	27.6	2	4	26.4	2	4	43	2	3	1.68	43	2	3	46.8	48	31.4	31.4	45	0.645161	0.422043	0.422043	12	1
10210627638	1	2	71	2	10	22	1	3	0.92	63.9	1	1.01	57.4	2	2	53.7	2	2	55	2	2	0.98	59	2	2	6.5	10.2	8.9	4.9	7.06522	0.159624	0.13928	0.0766823	30	1
11767846190	1	2	42	1	3.5	11	1	2	0.82	81.2	1	1.15	54	2	2	54.4	2	2	51	2	2	1.15	54	2	2	27.2	26.8	30.2	27.2	33.1707	0.330049	0.371921	0.334975	32	1
19792702580	1	1	52	1	14	31	1	4	1.11	73.9	1	2.26	32.5	2	3	81.5	1	1	32	2	3	2.27	32	2	3	41.4	-7.6	41.9	41.9	37.2973	-0.102842	0.566982	0.566982	3	1
62926290668	1	1	67	1	5.5	12	5		0.94	85	1	1.67	43.8	2	3	50	2	2	49	2	2	1.86	39	2	3	41.2	35	36	46	43.8298	0.411765	0.423529	0.541176	19	1
16177083340	1	2	54	2	6	12	1	2	0.83	76.1	1	1.32	44.5	2	3	54.4	2	2	52	2	2	1.06	57	2	2	31.6	21.7	24.1	19.1	38.0723	0.285151	0.316689	0.250986	27	1
59515505432	1	2	55	2	3	11	6		0.75	85.2	1	1.05	57.8	2	2	59	2	2	60	1	1	0.99	62	1	1	27.4	26.2	25.2	23.2	36.5333	0.307512	0.295775	0.2723	5	1
10658194846	1	2	68	1	8	21	1	2	0.73	113.5	1	1.19	64.6	1	1	55	2	2	56	2	2	0.95	62	1	1	48.9	58.5	57.5	51.5	66.9863	0.515419	0.506608	0.453744	21	1
13015217998	1	1	61	1	9	21	1	2	1	80.7	1	1.51	50.5	2	2				50	2	2	1.52	50	2	2	30.2		30.7	30.7	30.2		0.380421	0.380421	6	1
48019109642	1	1	52	1	14	31	1	4	0.85	101	1	0.85	101	1	1				85	1	1	0.98	85	1	1	0		16	16	0		0.158416	0.158416	13	1
61633141072	1	1	72	1	13	31	1	4	0.93	84.8	1	1.28	58.7	2	2	61	1	1	58	2	2	1.3	58	2	2	26.1	23.8	26.8	26.8	28.0645	0.28066	0.316038	0.316038	14	1
44236736500	1	2	76	1	5	12	1	4	0.87	67.2	1	1.45	37.3	2	3	44.7	2	3				1.24	44.7	2	3	29.9	22.5		22.5	34.3678	0.334821		0.334821	1	1
20425317330	1	1	63	1	2.5	11	1	3	0.83	99.4	1	1.4	54.4	2	2	61.4	1	1	56	2	2	1.01	79	1	1	45	38	43.4	20.4	54.2169	0.382294	0.43662	0.205231	24	1
12923944958	1	1	47	2	3.5	11	1	2	0.93	92.5	1	1.1	76	1	1	76	1	1				1.11	76	1	1	16.5	16.5		16.5	17.7419	0.178378		0.178378	1	1
51301421568	1	1	72	2	10	22	7		1.16	65.7	1	1.33	56.1	2	2	60	1	1				1.26	60	1	1	9.6	5.7		5.7	8.27586	0.086758		0.086758	2	1
14578098956	1	1	77	1	2.5	11	8		1.06	72.1	1	1.52	47.6	2	2	44.5	2	3	36	2	3	1.84	38	2	3	24.5	27.6	36.1	34.1	23.1132	0.382802	0.500693	0.472954	12	1
34298325668	1	2	58	2	9	21	1		0.88	70.1	1	0.85	73	1	1	80.6	1	1				0.61	107	1	1	-2.9	-10.5		-36.9	-3.29545	-0.149786		-0.526391	6	1
12374550456	1	2	74	1	5	12	1	3	0.68	89.9	1	0.99	58.2	2	2	47	2	2				1.08	52	2	2	31.7	42.9		37.9	46.6176	0.477197		0.42158	22	1
44065726734	1	1	72	2	4	12	5		0.98	79.9	1	1.93	36.5	2	3	38	2	3	42	2	3	1.54	47	2	2	43.4	41.9	37.9	32.9	44.2857	0.524406	0.474343	0.411765	20	1
28466016328	1	1	74	1	3	11	1	3	0.92	85.4	1	0.98	79	1	1				82	1	1	0.95	82	1	1	6.4		3.4	3.4	6.95652		0.0398126	0.0398126	16	1
16313301390	1	1	70	2	3	11	2	2	1.12	68.9	1	1.61	45	2	2	45	2	2	50	2	2	1.43	52	2	2	23.9	23.9	18.9	16.9	21.3393	0.34688	0.274311	0.245283	18	1
10574027624	1	2	45	1	9	21	1	4	0.71	95	1	0.95	68	1	1	48	2	2	53	2	2	1.17	53	2	2	27	47	42	42	38.0282	0.494737	0.442105	0.442105	8	1
23246188318	1	1	47	1	4	11	1	3	0.87	100	1	1.21	68.3	1	1	62	1	1	62	1	1	1.06	79	1	1	31.7	38	38	21	36.4368	0.38	0.38	0.21	6	1
27436054124	1	1	66	2	11	22	1	3	1.05	75	1	1.6	46	2	2	47	2	2	64	1	1	1.58	64	1	1	29	28	11	11	27.619	0.373333	0.146667	0.146667	12	1
36058207382	1	2	67	1	8	21	1	3	0.89	67	1	1.14	51	2	2	59	2	2				1	59	2	2	16	8		8	17.9775	0.119403		0.119403	1	1
48445810600	1	2	64	2	3	11	1		0.86	71	1	0.97	61	1	1	51	2	2				0.97	51	2	2	10	20		20	11.6279	0.28169		0.28169	1	1
39490848724	1	1	66	1	14	44	1		1.23	63	1	1.65	45	2	2	68	1	1	65	1	1	1.18	65	1	1	18	-5	-2	-2	14.6341	-0.0793651	-0.031746	-0.031746	8	1
55498137776	1	1	49	2	25	44	9		1.08	77	1	1.28	63	1	1	67	1	1	97	1	1	0.88	97	1	1	14	10	-20	-20	12.963	0.12987	-0.25974	-0.25974	12	1
22277613134	1	1	39	1	9.5	31	1	4	1.12	78	1	1.17	74	1	1	65	1	1				1.35	62	1	1	4	13		16	3.57143	0.166667		0.205128	5	1
46534065856	1	2	61	2	6	12	1	2	0.88	69	1	0.99	61	1	1	51	2	2	71	1	1	0.86	71	1	1	8	18	-2	-2	9.09091	0.26087	-0.0289855	-0.0289855	10	1
50722344456	1	2	57	2	5	12	1	2	0.99	83	1	1.34	58	2	2	46	2	2	64	1	1	1.21	65	1	1	25	37	19	18	25.2525	0.445783	0.228916	0.216867	4	1
10138220782	1	1	57	1	4.5	12	1	3	0.77	82	1	1.05	57	2	2	55	2	2	59	2	2	1.03	59	2	2	25	27	23	23	32.4675	0.329268	0.280488	0.280488	9	1
14039971262	1	1	65	2	2	11	1	1	1.09	72	1	1.06	75	1	1				53	2	2	1.43	53	2	2	-3		19	19	-2.75229		0.263889	0.263889	8	1
62395115608	1	1	68	2	4	11	1	2	1.19	65	1	1.74	42	2	3	43	2	3	44	2	3	1.64	44	2	3	23	22	21	21	19.3277	0.338462	0.323077	0.323077	10	1
26215364874	1	1	54	2	9	21	1	2	0.99	84	1	1.32	60	1	1	74	1	1	75	1	1	1.08	75	1	1	24	10	9	9	24.2424	0.119048	0.107143	0.107143	11	1
38683109840	1	2	71	1	12	22	1	2	0.74	82	1	0.78	77	1	1	79	1	1	97	1	1	0.64	97	1	1	5	3	-15	-15	6.75676	0.0365854	-0.182927	-0.182927	6	1
10056135540	1	2	60	1	7	31	1	2	0.8	78	1	1.04	57	2	2	73	1	1	67	1	1	0.91	67	1	1	21	5	11	11	26.25	0.0641026	0.141026	0.141026	9	1
38500127354	1	1	65	1	6	31	1	3	1.03	77	1	1.5	50	2	2	48	2	2				1.54	48	2	2	27	29		29	26.2136	0.376623		0.376623	3	1
68734064682	1	1	63	1	12	31	1	4	0.6	145	1	0.99	81	1	1	95	1	1	99	1	1	0.83	99	1	1	64	50	46	46	106.667	0.344828	0.317241	0.317241	6	1
13180021376	1	1	55	1	3	11	1		1.15	70	1	1.37	57	2	2	69	1	1	53	2	2	1.46	53	2	2	13	1	17	17	11.3043	0.0142857	0.242857	0.242857	6	1
399048	1	1	66	2	4	11	1	3	1.1	71.18	1	1.9	37.88	2	3	69.01	1	1	36.65	2	3	1.56	47	2	2	33.3	2.17	34.53	24.18	30.2727	0.0304861	0.485108	0.339702	61	1
719877	1	1	66	1	6	12	1	2	1.12	69.72	1	2.04	34.9	2	3	44.24	2	3	37.32	2	3	1.07	73	1	1	34.82	25.48	32.4	-3.28	31.0893	0.365462	0.464716	-0.0470453	48	1
516995	1	2	63	2	4.5	12	1	2	0.99	60.21	1	1.19	48.69	2	2	58.17	2	2	63.15	1	1	1.06	56	2	2	11.52	2.04	-2.94	4.21	11.6364	0.0338814	-0.0488291	0.0699219	52	1
510363	1	2	75	1	5	12	1	3	0.68	89.6	1	0.99	58.2	2	2	56.7	2	2	51.87	2	2	1.09	51.87	2	2	31.4	32.9	37.73	37.73	46.1765	0.367187	0.421094	0.421094	12	1
530491	1	2	54	1	2.5	11	1	2	0.78	81.8	1	0.85	74.08	1	1	73.09	1	1	64.13	1	1	0.81	78	1	1	7.72	8.71	17.67	3.8	9.89744	0.106479	0.216015	0.0464548	78	1
177056	1	1	43	1	2.5	11	1	2	0.66	140.01	1	0.99	87.69	1	1	86.68	1	1	85.29	1	1	0.81	82	1	1	52.32	53.33	54.72	58.01	79.2727	0.380901	0.390829	0.414328	84	1
604945	1	1	64	2	3.5	11	1	2	0.91	89.15	1	0.9	90.29	1	1				74.52	1	1	1.15	67.02	1	1	-1.14		14.63	22.13	-1.25275		0.164105	0.248233	55	1
856581	2	2	79	1			12		0.93	61.3	1	1.12	56.85	2	2	60.31	1	1	46.51	2	2	1.19	46.5	2	2	4.45	0.99	14.79	14.8	4.78495	0.0161501	0.241272	0.241436	12	1
879505	2	1	15	2			12		1	107	1	0.75	149.6	1	1				63.56	1	1	0.95	63.56	1	1	-42.6		43.44	43.44	-42.6		0.405981	0.405981	16	1
898095	2	2	53	2			12		0.93	67.03	1	0.84	75.38	1	1	67.03	1	1				0.93	67.03	1	1	-8.35	0		0	-8.97849	0		0	1	1
323570	2	2	55	2			12		0.92	67.36	1	1.03	59.13	2	2	69.09	1	1				0.89	69.09	1	1	8.23	-1.73		-1.73	8.94565	-0.0256829		-0.0256829	1	1
911336	2	1	35	1			12		1.19	73.94	1	1.11	80.12	1	1	68.59	1	1				1.27	68.59	1	1	-6.18	5.35		5.35	-5.19328	0.072356		0.072356	1	1
468528	2	2	66	2			12		0.78	78.54	1	0.88	68.33	1	1	63.32	1	1	72.1	1	1	0.9	70	1	1	10.21	15.22	6.44	8.54	13.0897	0.193787	0.0819964	0.108734	36	1
518858	2	2	44	2			12		0.66	103	1	0.65	105.24	1	1	86.55	1	1	86.55	1	1	1	96.62	1	1	-2.24	16.45	16.45	6.38	-3.39394	0.159709	0.159709	0.0619417	37	1
917100	2	1	60	2			12		1.22	64.4	1	1.07	74.93	1	1	59.85	2	2	62.62	1	1	1.28	61	1	1	-10.53	4.55	1.78	3.4	-8.63115	0.0706522	0.0276398	0.052795	17	1
620873	2	2	45	2			12		1.01	63	1	0.96	66.8	1	1	76.87	1	1	67.61	1	1	1.02	61	1	1	-3.8	-13.87	-4.61	2	-3.76238	-0.220159	-0.0731746	0.031746	35	1
493546	2	1	47	2			12		1.1	76.26	1	1.36	59.7	2	2	76.26	1	1				1.13	73	1	1	16.56	0		3.26	15.0545	0		0.0427485	19	1
937891	2	1	52	2			12		1.09	75.5	1	1.26	63.88	1	1							1.1	73.1	1	1	11.62			2.4	10.6606			0.0317881	6	1
965497	2	1	65	1			12		0.89	91.18	1	0.92	87.76	1	1	90.01	1	1	79	1	1	1	79	1	1	3.42	1.17	12.18	12.18	3.8427	0.0128318	0.133582	0.133582	11	1
967173	2	1	48	1			12		1.08	77.56	1	1.12	74.37	1	1	79.25	1	1				1	79.2	1	1	3.19	-1.69		-1.64	2.9537	-0.0217896		-0.0211449	2	1
972623	2	1	36	1			12		0.93	97.71	1	0.82	112.99	1	1	98	1	1				0.8	100	1	1	-15.28	-0.29		-2.29	-16.4301	-0.00296797		-0.0234367	28	1
263661	2	1	46	1			12		0.94	91.83	1	0.88	99.09	1	1							1.2	71	1	1	-7.26			20.83	-7.7234			0.226832	6	1
868428	2	1	22	1			12		1.15	84.52	1	1.07	91.85	1	1	69.06	1	1	88.04	1	1	1.3	75	1	1	-7.33	15.46	-3.52	9.52	-6.37391	0.182915	-0.0416469	0.112636	41	1
810882	2	1	24	2			12		1.24	76.12	1	1.34	69.91	1	1	68.43	1	1	79.06	1	1	1.1	90	1	1	6.21	7.69	-2.94	-13.88	5.00806	0.101025	-0.0386232	-0.182344	42	1
843672	2	2	53	1			12		0.52	131.11	1	0.71	91.52	1	1	109.05	1	1				0.96	64.62	1	1	39.59	22.06		66.49	76.1346	0.168256		0.507131	8	1
589798	2	1	51	2			12		1.1	75.01	1	1.07	77.44	1	1	64.13	1	1				1.22	64.1	1	1	-2.43	10.88		10.91	-2.20909	0.145047		0.145447	1	1
58339	2	2	53	1			13		0.68	96.02	1	0.82	77.51	1	1	80.91	1	1	66.21	1	1	0.7	89	1	1	18.51	15.11	29.81	7.02	27.2206	0.157363	0.310456	0.0731098	51	1
435448	1	1	61	1	11.5	31	1	4	1.07	74.68	1	1.18	66.7	1	1	73.88	1	1	80.74	1	1	1.5	50.57	2	2	7.98	0.8	-6.06	24.11	7.45794	0.0107124	-0.0811462	0.322844	25	1
783612	2	2	28	1			12		0.76	96.31	1	1.05	66.33	1	1	77.26	1	1				0.95	74.45	1	1	29.98	19.05		21.86	39.4474	0.197799		0.226975	10	1
645588	2	1	63	1			12		1.17	66.92	1	1.01	79.3	1	1							1.21	64.37	1	1	-12.38			2.55	-10.5812			0.0381052	10	1
784053	2	2	37	1			12		0.83	82.22	1	1.05	62.68	1	1				77	1	1	0.9	74	1	1	19.54		5.22	8.22	23.5422		0.0634882	0.0999757	47	1
781636	2	1	35	2			12		1.13	78.49	1	1.34	64.47	1	1	69.22	1	1	91.43	1	1	1.1	79	1	1	14.02	9.27	-12.94	-0.51	12.4071	0.118104	-0.164862	-0.00649764	54	1
776524	2	2	66	2			13		0.67	93.6	1	0.53	122.67	1	1	110.55	1	1	104.3	1	1	0.6	100	1	1	-29.07	-16.95	-10.7	-6.4	-43.3881	-0.18109	-0.114316	-0.0683761	58	1
764324	2	1	49	2			12		1.21	67.74	1	1.19	69.06	1	1	61.81	1	1	59.2	2	2	1.7	47	2	2	-1.32	5.93	8.54	20.74	-1.09091	0.0875406	0.12607	0.306171	48	1
654200	2	1	44	1			12		0.96	90.44	1	1.1	77.29	1	1	82.46	1	1	74.93	1	1	1.23	67.94	1	1	13.15	7.98	15.51	22.5	13.6979	0.0882353	0.171495	0.248784	22	1
620520	2	2	52	1			12		0.69	94.96	1	0.78	82.43	1	1	46.97	2	2				0.78	46.9	2	2	12.53	47.99		48.06	18.1594	0.505371		0.506108	1	1
711840	2	2	64	1			13		0.67	94.18	1	0.93	64.51	1	1	123.44	1	1				0.71	88.7	1	1	29.67	-29.26		5.48	44.2836	-0.310682		0.0581865	17	1
335520	2	1	72	2			12		1.11	69.21	1	1.08	71.43	1	1	54.75	2	2				1.08	54.7	2	2	-2.22	14.46		14.51	-2	0.208929		0.209652	1	1
707016	1	1	82	2	6	12	7		1.15	64.71	1	1.24	59.32	2	2	70.32	1	1	57.19	2	2	1.4	51.57	2	2	5.39	-5.61	7.52	13.14	4.68696	-0.0866945	0.116211	0.20306	15	1
702972	2	1	50	1			12		0.89	96.17	1	0.76	115.39	1	1	115.39	1	1				0.85	101.41	1	1	-19.22	-19.22		-5.24	-21.5955	-0.199854		-0.0544868	5	1
585270	2	2	41	1			12		0.78	86.51	1	0.65	106.76	1	1							0.71	96.42	1	1	-20.25			-9.91	-25.9615			-0.114553	14	1
579522	2	1	61	2			12		1.18	66.7	1	1.1	72.33	1	1	78.03	1	1				1.1	78.03	1	1	-5.63	-11.33		-11.33	-4.77119	-0.169865		-0.169865	1	1
307561	2	1	79	2			12		0.74	108.44	1	1.22	60.9	1	1	106.78	1	1				1.22	106.78	1	1	47.54	1.66		1.66	64.2432	0.015308		0.015308	1	1
546665	2	2	56	1			12		0.85	73.53	1	0.84	74.54	1	1							1.2	52	2	2	-1.01			21.53	-1.18824			0.292806	82	1
552532	2	2	28	2			12		0.8	90.78	1	0.8	90.78	1	1	87	1	1				0.8	87	1	1	0	3.78		3.78	0	0.0416391		0.0416391	1	1
531186	2	1	60	1			12		0.98	82.92	1	1.07	74.93	1	1	78.03	1	1	75.45	1	1	1.1	75	1	1	7.99	4.89	7.47	7.92	8.15306	0.0589725	0.0900868	0.0955137	87	1
841300	2	1	46	1			12		0.86	101.7	1	0.93	92.9	1	1							0.9	95	1	1	8.8			6.7	10.2326			0.06588	42	1
167456	1	1	58	2	3	11	7		0.77	110.2	1	1.53	49.9	2	2							1.4	56.5	2	2	60.3			53.7	78.3117			0.487296	11	1
955092	2	1	66	1			12		1.11	71.1	1	0.98	81.3	1	1	82	1	1	68	1	1	0.9	90	1	1	-10.2	-10.9	3.1	-18.9	-9.18919	-0.153305	0.0436006	-0.265823	26	1
1120322	1	2	38	2	8	21	10		0.76	91	1	0.83	82	1	1	68	1	1				0.83	68	1	1	9	23		23	11.8421	0.252747		0.252747	1	1
1116562	2	1	46	2			12		1.2	69	1	0.94	92	1	1	80	1	1				1.1	80	1	1	-23	-11		-11	-19.1667	-0.15942		-0.15942	1	1
711028	1	2	60	1	8	21	10		0.84	74	1	1	60	1	1	65	1	1				0.9	65	1	1	14	9		9	16.6667	0.121622		0.121622	3	1
682051	2	1	48	2			12		1.22	67	1	1.25	65	1	1	85	1	1				1.1	78	1	1	2	-18		-11	1.63934	-0.268657		-0.164179	4	1
1033578	2	1	74	2			13		1.04	74	1	1.11	69	1	1	77	1	1				1	77	1	1	5	-3		-3	4.80769	-0.0405405		-0.0405405	2	1
1070432	2	2	22	2			13		0.84	90	1	0.95	78.1	1	1							1	78	1	1	11.9			12	14.1667			0.133333	8	1
822014	2	1	24	2			12		1.28	73	1	1.16	82	1	1	81	1	1	81	1	1	1.2	81	1	1	-9	-8	-8	-8	-7.03125	-0.109589	-0.109589	-0.109589	13	1
1018026	2	1	45	2			12		0.91	96	1	0.82	108	1	1	75	1	1	89	1	1	1	89	1	1	-12	21	7	7	-13.1868	0.21875	0.0729167	0.0729167	8	1
1046907	2	1	28	1			12		1.12	83	1	1.26	72	1	1	78.1	1	1	75	1	1	1.2	75	1	1	11	4.9	8	8	9.82143	0.0590361	0.0963855	0.0963855	5	1
467222	2	1	67	2			12		1.26	60.6	1	0.95	84.05	1	1				63	1	1	1	75	1	1	-23.45		-2.4	-14.4	-18.6111		-0.039604	-0.237624	19	1
1099837	2	2	21	2			12		0.81	95	1	0.69	114	1	1	84	1	1				0.96	86	1	1	-19	11		9	-23.4568	0.115789		0.0947368	2	1
1047717	2	2	48	2			12		0.8	81	1	0.81	80	1	1	66	1	1				1	66	1	1	1	15		15	1.25	0.185185		0.185185	3	1
640089	2	1	64	2			12		1.26	61	1	1.22	64	1	1	66	1	1				1	81	1	1	-3	-5		-20	-2.38095	-0.0819672		-0.327869	10	1
1029906	2	1	56	2			12		1.04	79	1	0.83	102	1	1	80	1	1	104	1	1	1	80	1	1	-23	-1	-25	-1	-22.1154	-0.0126582	-0.316456	-0.0126582	15	1
1004872	2	2	49	1			12		0.82	78	1	0.97	64.8	1	1	66	1	1				0.9	70	1	1	13.2	12		8	16.0976	0.153846		0.102564	9	1
972556	2	2	46	2			12		0.95	67.3	1	0.82	79.7	1	1	64	1	1				1	64	1	1	-12.4	3.3		3.3	-13.0526	0.0490342		0.0490342	1	1
222841	2	2	52	2			12		0.84	75.6	1	0.72	90.4	1	1	74	1	1	66	1	1	0.7	90	1	1	-14.8	1.6	9.6	-14.4	-17.619	0.021164	0.126984	-0.190476	20	1
981914	2	2	45	1			12		0.96	67	1	0.8	82.4	1	1	70	1	1	64	1	1	0.8	78	1	1	-15.4	-3	3	-11	-16.0417	-0.0447761	0.0447761	-0.164179	23	1
214484	2	2	27	2			12		0.81	90	1	0.78	94	1	1	88	1	1				0.82	88.88	1	1	-4	2		1.12	-4.93827	0.0222222		0.0124444	1	1
538289	2	1	56	2			12		1.1	73.6	1	1.05	77.6	1	1	70.63	1	1	73.33	1	1	1.2	65.4	1	1	-4	2.97	0.27	8.2	-3.63636	0.0403533	0.00366848	0.111413	71	1
540982	2	1	23	2			12		0.91	109.74	1	0.67	156.24	1	1	101.94	1	1	95.12	1	1	1.18	81	1	1	-46.5	7.8	14.62	28.74	-51.0989	0.0710771	0.133224	0.261892	92	1
539340	2	2	66	2			12		0.91	65.74	1	1.36	41.35	2	3	50.69	2	2	56.81	2	2	1	59	2	2	24.39	15.05	8.93	6.74	26.8022	0.228932	0.135838	0.102525	90	1
551740	2	1	67	2			12		1.22	62.97	1	1.61	45.72	2	2							1.61	46	2	2	17.25			16.97	14.1393			0.269493	74	1
557055	2	2	50	2			13		0.66	100.76	1	0.82	78.43	1	1	83.09	1	1	72	1	1	0.86	74	1	1	22.33	17.67	28.76	26.76	33.8333	0.175367	0.285431	0.265582	85	1
555297	2	2	70	2			12		0.78	77.6	1	1.31	42.66	2	3	49.09	2	2				2.56	19.42	2	4	34.94	28.51		58.18	44.7949	0.367397		0.749742	59	1
568948	2	1	43	1			12		1.08	79.31	1	1.01	85.69	1	1	87.69	1	1	79.6	1	1	1.1	76.26	1	1	-6.38	-8.38	-0.29	3.05	-5.90741	-0.105661	-0.00365654	0.0384567	54	1
572526	2	2	55	1			12		0.72	89.38	1	0.61	108.23	1	1	68.22	1	1	66.28	1	1	0.79	80	1	1	-18.85	21.16	23.1	9.38	-26.1806	0.236742	0.258447	0.104945	72	1
384123	2	1	49	1			12		0.97	87.43	1	1.01	83.45	1	1				89.19	1	1	0.93	89.99	1	1	3.98		-1.76	-2.56	4.10309		-0.0201304	-0.0292806	60	1
595725	2	2	65	1			12		0.94	63.52	1	1.11	52.43	2	2				36.93	2	3	1.15	50	2	2	11.09		26.59	13.52	11.7979		0.418608	0.212846	62	1
710711	2	2	65	2			12		0.65	97.23	1	0.63	100.8	1	1	95.53	1	1	98.98	1	1	0.74	84	1	1	-3.57	1.7	-1.75	13.23	-5.49231	0.0174843	-0.0179986	0.136069	49	1
711167	2	1	46	2			12		1.02	83.57	1	0.93	92.9	1	1	77.41	1	1	68.32	1	1	0.93	93	1	1	-9.33	6.16	15.25	-9.43	-9.14706	0.0737107	0.182482	-0.11284	60	1
530257	2	2	50	1			12		0.83	77.34	1	0.66	100.76	1	1	91.13	1	1	66.73	1	1	0.64	104	1	1	-23.42	-13.79	10.61	-26.66	-28.2169	-0.178304	0.137186	-0.344712	63	1
549766	2	1	58	2			12		1.23	64.24	1	1.43	53.99	2	2	58.19	2	2	69.3	1	1	1.11	72	1	1	10.25	6.05	-5.06	-7.76	8.33333	0.0941781	-0.0787671	-0.120797	50	1
12958185616	2	2	27	1			12		0.81	90.1	1	0.78	94.1	1	1	88.8	1	1				0.82	88.8	1	1	-4	1.3		1.3	-4.93827	0.0144284		0.0144284	1	1
11682132576	2	1	69	2			12		1.16	66.3	1	1.68	43.2	2	3	54.7	2	2				1.36	54	2	2	23.1	11.6		12.3	19.9138	0.174962		0.18552	7	1
858595	2	1	58	1			12		1.03	78.8	1	1.13	70.8	1	1	59.7	2	2	51	2	2	1.42	54	2	2	8	19.1	27.8	24.8	7.76699	0.242386	0.352792	0.314721	20	1
16024145610	2	2	70	1			12		0.77	78.7	1	0.65	95.7	1	1	69.3	1	1	51	2	2	1.12	51	2	2	-17	9.4	27.7	27.7	-22.0779	0.119441	0.35197	0.35197	4	1
325526	1	2	52	1	5	44	9		0.68	111	1											0.82	77	1	1				34				0.306306	51	1
806621	1	1	71	1	9	21	2			88	1											1.77	40.6	2	3				47.4				0.538636	15	1
765220	1	1	59	1	2	11	5			81	1											1.44	53	2	2				28				0.345679	57	1
696251	1	1	64	2	4	11	1	2		104	1											1.17	66	1	1				38				0.365385	47	1
676115	1	2	73	1	5.5	12	1	2		75	1											0	36	2	3				39				0.52	23	1
651893	1	2	39	2	4	11	1	2		100	1											1.12	57	2	2				43				0.43	60	1
652298	1	1	64	1	10	31	1	2		104	1											0	59	2	2				45				0.432692	12	1
257988	1	2	46	1	4	11	1	2		82.8	1											0.98	64	1	1				18.8				0.227053	71	1
644590	1	1	58	1	9	21	2	2		82	1											0	73.3	1	1				8.7				0.106098	12	1
643016	1	2	71	1	4.7	12	1	2		75.5	1											1.13	50	2	2				25.5				0.337748	46	1
632652	1	2	39	1	4	11	2	1		147.5	1											0.67	103	1	1				44.5				0.301695	74	1
632074	1	1	55	2	4.5	12	5			107.4	1											0	73.8	1	1				33.6				0.312849	29	1
629073	1	2	54	2	5	12	1	2		61.8	1											1.14	52	2	2				9.8				0.158576	72	1
610177	1	2	68	2	3	11	1	2		106.6	1											1.27	44	2	3				62.6				0.587242	79	1
578977	1	2	63	2	4	11	1	2		67.8	1											1.19	48	2	2				19.8				0.292035	70	1
8362	1	2	62	2	7.5	21	1	2		66	1											1.36	40	2	3				26				0.393939	57	1
150978	1	1	67	1	5	12	1	2		87.6	1											0	45.3	2	2				42.3				0.482877	12	1
532501	1	2	70	1	4	11	1	2		65.4	1											1.19	47	2	2				18.4				0.281346	81	1
599498	1	2	47	2	8	21	2	2		142	1											0	82	1	1				60				0.422535	16	1
388935	1	1	75	2	5	12	1	2		78	1											0	42	2	3				36				0.461538	12	1
592380	1	1	57	1	6	12	1	3		149.8	1											1	81	1	1				68.8				0.459279	58	1
585643	1	1	63	1	5	12	3			72.5	1											1.23	63	1	1				9.5				0.131034	79	1
587237	1	1	44	1	6	12	1	4		113	1											0	64	1	1				49				0.433628	24	1
577442	1	1	50	1	4.5	12	1	2		69	1											1.41	56	2	2				13				0.188406	75	1
573300	1	2	54	1	7	21	2			112	1											0.7	92	1	1				20				0.178571	85	1
566845	1	1	70	1	5.5	12	1	2		89	1											0	37.8	2	3				51.2				0.575281	34	1
569527	1	1	60	1	5.5	12	1	3		92	1											0	55.3	2	2				36.7				0.398913	26	1
533244	1	1	74	1						101.5	1											0	78.2	1	1				23.3				0.229557	12	1
536125	1	1	70	2	4.5	12	1	2		79.4	1											0	46	2	2				33.4				0.420655	10	1
547394	1	2	67	2	7	12	1	3		106.9	1											0	89.2	1	1				17.7				0.165575	12	1
537187	1	1	61	1	4	11	5			73	1											0	51.5	2	2				21.5				0.294521	40	1
522379	1	1	70	2	4	11	2			79	1											0	45.9	2	2				33.1				0.418987	48	1
516320	1	1	64	2	6.5	12	1	4		180	1											0	92	1	1				88				0.488889	12	1
510924	1	1	61	1	6	12	1	2		81	1											0	66	1	1				15				0.185185	13	1
510825	1	1	68	1	12	22	2			64	1											2.14	33	2	3				31				0.484375	84	1
496958	1	2	60	1	9.5	21	7			135	1											0	92	1	1				43				0.318519	48	1
497459	1	1	54	1	7	21	7			68	1											0	62	1	1				6				0.0882353	36	1
496494	1	1	64	2	9	21	3	2		104	1											1.12	70	1	1				34				0.326923	87	1
491986	1	1	64	1	8	21	2	3		91	1											1.07	72.8	1	1				18.2				0.2	53	1
490356	1	1	76	2	6	12	1	3		88.1	1											0	48.7	2	2				39.4				0.447219	12	1
485558	1	2	58	1	3.5	11	7			79.7	1											0	61	1	1				18.7				0.23463	38	1
483634	1	2	58	1	5.5	12	1	2		93	1											0	70	1	1				23				0.247312	12	1
480898	1	1	58	2	8	21	1	2		93	1											0	66.8	1	1				26.2				0.28172	12	1
446749	1	1	71	1	3	11	6			64	1											0	23	2	4				41				0.640625	56	1
122881	1	2	55	2	5	12	5			94	1											0	46	2	2				48				0.510638	12	1
231208	1	2	48	1	6	12	1	3		142	1											0.59	114	1	1				28				0.197183	106	1
700830	1	1	49	1	8	21	1	2		96	1												85	1	1				11				0.114583	3	1
699679	1	2	38	2	3	11	1	2		119.5	1												74.8	1	1				44.7				0.374059	3	1
430376	1	2	68	2	2.5	11	1	2		76.2	1												37	2	3				39.2				0.514436	5	1
670938	1	1	64	1	7	12	9			80.5	1												65.4	1	1				15.1				0.187578	3	1
664619	1	2	69	2	11	22	1	2		119.5	1												71	1	1				48.5				0.405858	3	1
643269	1	1	68	1	5	12	1	2		71	1												46	2	2				25				0.352113	6	1
620684	1	1	72	2	6	12	1	2		88	1												63.6	1	1				24.4				0.277273	6	1
616915	1	1	65	2	10	21	1	3		90.8	1												80.2	1	1				10.6				0.11674	6	1
604678	1	2	42	1	5	12	1	2		118.6	1												84.7	1	1				33.9				0.285835	6	1
597200	1	1	44	1	7	12	11			98.8	1												78.4	1	1				20.4				0.206478	4	1
591543	1	2	34	1	6	12	11			124.7	1												78.1	1	1				46.6				0.373697	2	1
583979	1	1	58	1	9	21	1	2		93	1												83	1	1				10				0.107527	3	1
571860	1	2	70	2	9	21	7			76	1												66	1	1				10				0.131579	3	1
566917	1	1	64	1	14	22	1	3		81	1												59.6	2	2				21.4				0.264198	6	1
559564	1	2	25	2	6.5	12	4	3		132	1												64.4	1	1				67.6				0.512121	3	1
556832	1	1	43	2	6	12	9			87.9	1												59.3	2	2				28.6				0.32537	3	1
541546	1	1	66	2						65	1												59	2	2				6				0.0923077	6	1
537912	1	1	57	2	7.5	21	1	3		93.8	1												48.1	2	2				45.7				0.487207	9	1
534480	1	1	47	1	6	12	1	2		86	1												63.7	1	1				22.3				0.259302	6	1
515494	1	2	39	2	4.5	12	1	2		136	1												116.9	1	1				19.1				0.140441	3	1
511676	1	1	25	2	14	22	5			150	1												112	1	1				38				0.253333	8	1
501975	1	1	57	2	5	12	2			107	1												51.6	2	2				55.4				0.517757	3	1
480568	1	2	57	2	7	22	1	3		111	1												70	1	1				41				0.369369	8	1
